# Supplementary material for: High Efficiency of Low Dose Preparations of an Inactivated Lumpy Skin Disease Virus Vaccine Candidate
Source: MDPI journal article supplement (doi:10.3390/vaccines10071029), 2022-06-27
Supplement: s1 [file s1]

**Table S1.** Viral genome load (Cq values) of organ samples taken during necropsy.

| <b>Cattle</b>                        |       | <b>Cervical lymph node</b> | <b>Mediastinal lymph node</b> | <b>Liver</b> | <b>Lung</b> |
|--------------------------------------|-------|----------------------------|-------------------------------|--------------|-------------|
| Group A:<br>undiluted<br>antigen     | R-701 | no Cq                      | no Cq                         | no Cq        | no Cq       |
|                                      | R-717 | no Cq                      | no Cq                         | no Cq        | no Cq       |
|                                      | R-650 | no Cq                      | no Cq                         | no Cq        | no Cq       |
|                                      | R-725 | no Cq                      | no Cq                         | no Cq        | no Cq       |
|                                      | R-765 | no Cq                      | no Cq                         | no Cq        | no Cq       |
|                                      | R-756 | no Cq                      | no Cq                         | no Cq        | no Cq       |
| Group B:<br>antigen diluted<br>1:10  | R-722 | no Cq                      | no Cq                         | no Cq        | no Cq       |
|                                      | R-689 | no Cq                      | no Cq                         | no Cq        | no Cq       |
|                                      | R-729 | no Cq                      | no Cq                         | no Cq        | no Cq       |
|                                      | R-759 | no Cq                      | no Cq                         | no Cq        | no Cq       |
|                                      | R-987 | no Cq                      | no Cq                         | no Cq        | no Cq       |
|                                      | R-993 | no Cq                      | no Cq                         | no Cq        | no Cq       |
| Group C:<br>antigen diluted<br>1:100 | R-672 | no Cq                      | no Cq                         | n.t.         | no Cq       |
|                                      | R-643 | no Cq                      | no Cq                         | no Cq        | no Cq       |
|                                      | R-703 | no Cq                      | no Cq                         | no Cq        | no Cq       |
|                                      | R-727 | no Cq                      | no Cq                         | no Cq        | no Cq       |
|                                      | R-760 | no Cq                      | no Cq                         | no Cq        | no Cq       |
|                                      | R-994 | no Cq                      | no Cq                         | no Cq        | no Cq       |
| Group D:<br>challenge<br>control     | R-728 | 27.0                       | 32.2                          | no Cq        | 31.1        |
|                                      | R-714 | no Cq                      | no Cq                         | no Cq        | no Cq       |
|                                      | R-684 | no Cq                      | no Cq                         | no Cq        | no Cq       |
|                                      | R-762 | 27.3                       | 34.7                          | no Cq        | 24.8        |
|                                      | R-988 | 29.4                       | 37.3                          | no Cq        | 32.3        |

n.t. indicates sample not taken.
